# Supplementary material
Source: PubMed Central journal article supplement (PMC7124707)
Supplement: rccm.201911-2187OC_stanski_data_supplement.pdf [file rccm.201911-2187OC_stanski_data_supplement.pdf]

**PERSEVERE Biomarkers Predict Severe Acute Kidney Injury and Renal Recovery  
in Pediatric Septic Shock**

Natalja L. Stanski, MD, Erin K. Stenson, MD, Natalie Z. Cvijanovich, MD, Scott L. Weiss, MD, Julie C. Fitzgerald, MD, PhD, Michael T. Bigham, MD, Parag N. Jain, MD, Adam Schwarz, MD, Riad Lutfi, MD, Jeffrey Nowak, MD, Geoffrey L. Allen, MD, Neal J. Thomas, MD, Jocelyn R. Grunwell MD, PhD, Torrey Baines, MD, Michael Quasney, MD, Bereketiab Haileselassie, MD, and Hector R. Wong, MD

**Online Data Supplement**

**Table E1:** Patient outcomes by PERSEVERE-II mortality probability risk category.

|                             | <b>PERSEVERE-II<br/>Low Risk</b> | <b>PERSEVERE-II<br/>Intermediate Risk</b> | <b>PERSEVERE-II<br/>High Risk</b> | <b>P value</b> |
|-----------------------------|----------------------------------|-------------------------------------------|-----------------------------------|----------------|
| <b>Total</b>                | 241 (64)                         | 85 (22)                                   | 53 (14)                           | --             |
| <b>Age (years)*</b>         | 6.3 (1.9-12.4)                   | 8.5 (3.1-14.3)                            | 4.8 (1.6-11)                      | 0.27           |
| <b>Gender, n (% male)</b>   | 123 (51)                         | 45 (53)                                   | 27 (51)                           | 0.952          |
| <b>Mortality</b>            | 5 (2)                            | 15 (18)                                   | 22 (42)                           | <0.001         |
| <b>Day 3 Severe AKI</b>     | 24 (10)                          | 16 (19)                                   | 24 (45)                           | <0.001         |
| <b>RRT Use</b>              | 9 (4)                            | 12 (14)                                   | 17 (32)                           | <0.001         |
| <b>Day 1-2 AKI</b>          | 60 (25)                          | 38 (45)                                   | 33 (62)                           | <0.001         |
| <b>Day 3 Renal Recovery</b> | 29 (48)                          | 17 (45)                                   | 8 (24)                            | 0.039          |

\*Categorical variables are reported as n (%) and continuous variables as median (IQR)
